# Supplementary material for: A Compendium of Caenorhabditis elegans RNA Binding Proteins Predicts Extensive Regulation at Multiple Levels
Source: PubMed Central journal article supplement (PMC3564989; doi:10.1534/g3.112.004390), 2013-02-01
Supplement: supp_3.2.297_FigureS1.pdf [file supp_3.2.297_FigureS1.pdf]

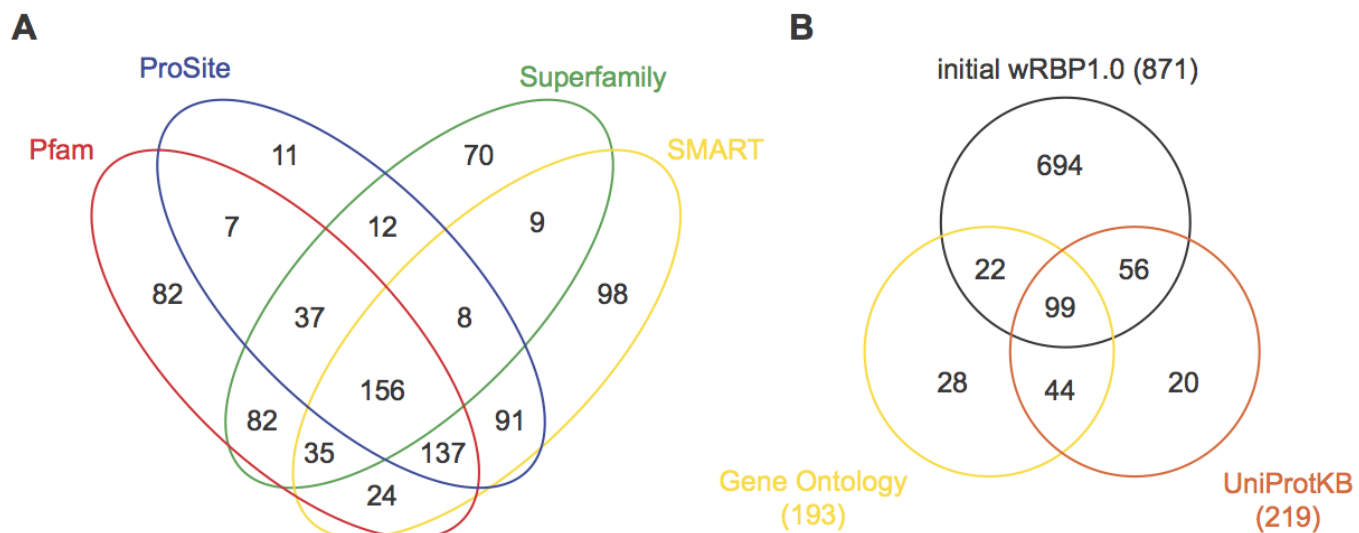

**Figure S1** Venn diagrams of: (A) Cross-validation of programs used by InterProScan, and (B) initial wRBP1.0 list together with Gene Ontology and UniProtKB listed RBPs
