# Supplementary material for: A Compendium of Caenorhabditis elegans RNA Binding Proteins Predicts Extensive Regulation at Multiple Levels
Source: PubMed Central journal article supplement (PMC3564989; doi:10.1534/g3.112.004390), 2013-02-01
Supplement: supp_3.2.297_FigureS3.pdf [file supp_3.2.297_FigureS3.pdf]

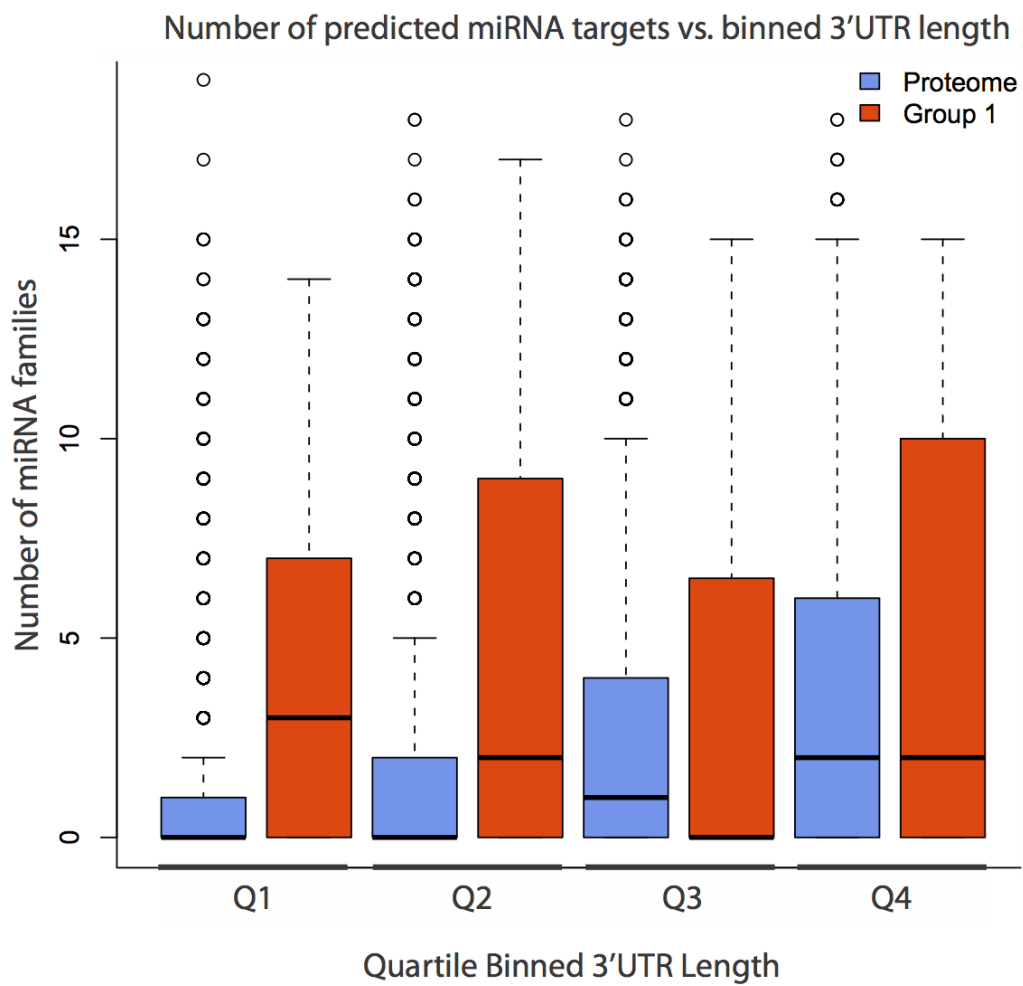

**Figure S3** Quartile binned boxplots of miRNAs targeting RBP 3' UTRs vs. 3'UTRome. Quartiles were determined using the total 3'UTRome. The distribution of 3' UTR lengths are shown for each quartile.
