# Supplementary material for: A Compendium of Caenorhabditis elegans RNA Binding Proteins Predicts Extensive Regulation at Multiple Levels
Source: PubMed Central journal article supplement (PMC3564989; doi:10.1534/g3.112.004390), 2013-02-01
Supplement: supp_3.2.297_FigureS4.pdf [file supp_3.2.297_FigureS4.pdf]

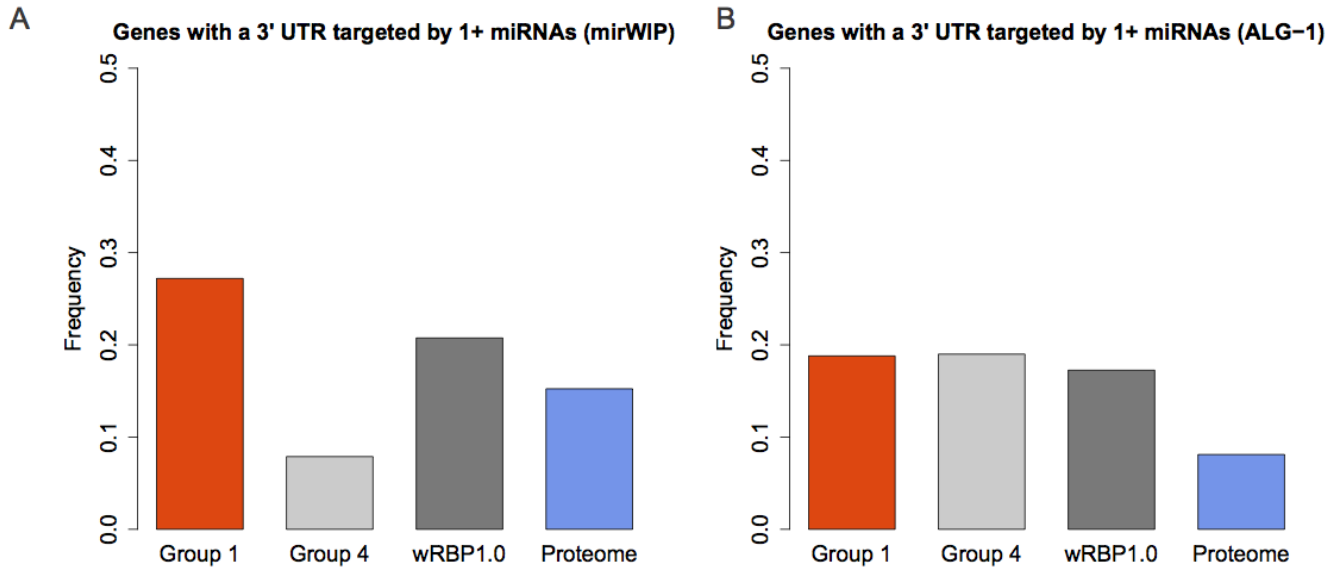

**Figure S4** miRNA targeting. Frequency of 3' UTRs targeted by miRNAs according to (A) mirWIP predictions and (B) ALG-1 IP binding data
