# Supplementary material for: A Compendium of Caenorhabditis elegans RNA Binding Proteins Predicts Extensive Regulation at Multiple Levels
Source: PubMed Central journal article supplement (PMC3564989; doi:10.1534/g3.112.004390), 2013-02-01
Supplement: supp_3.2.297_TableS1.pdf [file supp_3.2.297_TableS1.pdf]

**Table S1 RBP Domains.** Domain, abbreviation, group, *C.elegans* examples, example protein homologs, reference

| Domain                                                                                             | Abbrev.  | Group | <i>C.elegans</i> examples | Example protein homologs                                    | Publications                                                                     |
|----------------------------------------------------------------------------------------------------|----------|-------|---------------------------|-------------------------------------------------------------|----------------------------------------------------------------------------------|
| RNA recognition motif                                                                              | RRM      | 1     | FOX-1<br>RNP-8            | <i>H. sapiens</i> PABP, hnRNP C                             | Adams et al., 1986; Swanson et al., 1987; Kim et al., 2010                       |
| K homology (KH)                                                                                    | KH       | 1     | MEX-3<br>GLD-1            | <i>H. sapiens</i> hnRNP K                                   | Siomi et al., 1993; Pagano et al., 2009; Ryder et al., 2004; Wright et al., 2010 |
| Pumilio/FBF                                                                                        | PUF      | 1     | FBF-1/2                   | <i>D. melanogaster</i> Pumilio                              | Zamore et al., 1997; Zhang et al., 1997; Bernstein et al., 2005                  |
| CCCH zinc finger                                                                                   | ZF_CCCH  | 1     | POS-1<br>MEX-5            | <i>H. sapiens</i> TTP                                       | Carballo et al., 1998; Pagano et al., 2007; Farley et al., 2008                  |
| CCHC zinc finger                                                                                   | ZF_CCHC  | 1     | LIN-28                    | <i>H. sapiens</i> Lin28                                     | Balzer and Moss, 2007                                                            |
| Double stranded RNA binding domain                                                                 | DSRBD    | 1     | ADR-1, -2                 | <i>H. sapiens</i> Adar1, Adar2                              | Tian et al., 2004; Furic et al., 2008; Stefl et al., 2010                        |
| RGG box                                                                                            | RGG      | 1     | PGL-1                     | <i>H. sapiens</i> hnRNP U, FMRP                             | Kiledjian and Dreyfuss, 1992; Ashley et al., 1993; Siomi et al., 1993            |
| La                                                                                                 | La       | 1     | LARP-1<br>LARP-5          | <i>H. sapiens</i> La                                        | Nykamp et al., 2008; Intine et al., 2003                                         |
| RNA Helicase                                                                                       | HEL      | 2     | GLH-1                     | <i>D. melanogaster</i> VAS                                  | Jankowsky, 2010                                                                  |
| PAZ, PIWI, Argonautes                                                                              | PAZ,PIWI | 2     | ALG-1<br>CSR-1            | <i>D. melanogaster</i> PIWI                                 | Yan et al., 2003; Kaymak et al., 2010; Cenik and Zamore, 2011                    |
| Nuclear transport factor 2                                                                         | NTF2     | 2     | NXF-2                     |                                                             | JR Williamson (personal communication)                                           |
| C2H2 zinc finger                                                                                   | ZF_C2H2  | 3     | MEP-1                     | <i>X. laevis</i> TFIIIA                                     | Hall, 2005; Lu et al., 2003; Belfiore et al., 2002                               |
| Sterile alpha motif                                                                                | SAM      | 3     | BCC-1                     | <i>D. melanogaster</i> Smaug,<br><i>S. cerevisiae</i> Vts1  | Green et al., 2003; Aviv et al., 2003, Aviv et al., 2006                         |
| Cold shock                                                                                         | CSD      | 3     | CEY-1<br>LIN-28           | <i>H. sapiens</i> Unr                                       | Triqueneaux et al, 1999                                                          |
| General factors:<br>Translation factors,<br>tRNA proteins,<br>Ribosomal proteins,<br>Ribonucleases | GF       | 4     | IFE-4<br>EXO-1            | <i>H. sapiens</i> eIF4G,<br><i>S. cerevisiae</i> Ccr4, Xrn1 | Rhoads et al., 2006; Garneau et al., 2007                                        |
| Sm/Lsm                                                                                             | Sm       | 4     | CAR-1                     | <i>S. cerevisiae</i> Lsm1, Lsm2                             | He and Parker, 2000                                                              |
